# Supplementary material for: Lifestyle behaviour change for preventing the progression of chronic kidney disease: a systematic review
Source: PubMed Central journal article supplement — BMJ Open. 2019 Oct 28;9(10):e031625. doi: 10.1136/bmjopen-2019-031625 (PMC6830616; doi:10.1136/bmjopen-2019-031625), 2019-10-28
Supplement: bmjopen-2019-031625supp002.pdf [file bmjopen-2019-031625supp002.pdf]

**File S2. Search strategies**

Search results: MEDLINE via OvidSP (1946 to 20 September 2018)

| #  | Search terms                                                                                                                                    | Results   |
|----|-------------------------------------------------------------------------------------------------------------------------------------------------|-----------|
| 1  | exp Renal Insufficiency/                                                                                                                        | 152,141   |
| 2  | exp Renal Insufficiency, Chronic/                                                                                                               | 101,640   |
| 3  | Kidney diseases/                                                                                                                                | 79,478    |
| 4  | (chronic kidney or chronic renal).tw.                                                                                                           | 59,047    |
| 5  | (CKD or CRD).tw.                                                                                                                                | 19,371    |
| 6  | (predialysis or pre-dialysis).tw.                                                                                                               | 4,177     |
| 7  | 1 or 2 or 3 or 4 or 5 or 6                                                                                                                      | 243,965   |
| 8  | exp health behaviour/                                                                                                                           | 163,935   |
| 9  | exp habits/                                                                                                                                     | 34,134    |
| 10 | lifestyle\$.tw.                                                                                                                                 | 66,158    |
| 11 | exp Health promotion/                                                                                                                           | 67,019    |
| 12 | exp Health education/                                                                                                                           | 155,589   |
| 13 | exp Diet/                                                                                                                                       | 240,468   |
| 14 | exp Diet Therapy/                                                                                                                               | 48,800    |
| 15 | exp Food Habits/                                                                                                                                | 33,822    |
| 16 | Fruit/ and Vegetables/                                                                                                                          | 9,462     |
| 17 | ((diet or diets or dietary) adj5 (Mediterranean or vegetarian or plant-based or American Heart Association* or DASH or western or seafood)).tw. | 9,130     |
| 18 | ((diet or dietary or nutrition*) adj (survey* or record or records or score)).tw.                                                               | 6,572     |
| 19 | exp Exercise/                                                                                                                                   | 160,256   |
| 20 | exp Exercise therapy/                                                                                                                           | 42,215    |
| 21 | exp Exercise movement techniques/                                                                                                               | 6,911     |
| 22 | aerobic exercise/                                                                                                                               | 90,067    |
| 23 | exp Smoking/                                                                                                                                    | 140,996   |
| 24 | exp Smoking cessation/                                                                                                                          | 25,651    |
| 25 | exp Drinking behaviour/                                                                                                                         | 68,788    |
| 26 | exp Alcoholism/                                                                                                                                 | 72,211    |
| 27 | exp Alcoholic intoxication/                                                                                                                     | 12,043    |
| 28 | exp Binge drinking/                                                                                                                             | 1,195     |
| 29 | 8 or 9 or 10 or 11 or 12 or 13 or 14 or 15 or 16 or 17 or 18 or 19 or 20 or 21 or 22 or 23 or 24 or 25 or 26 or 27 or 28                        | 1,027,712 |
| 30 | randomized controlled trial.pt.                                                                                                                 | 466,609   |
| 31 | pragmatic clinical trial.pt.                                                                                                                    | 761       |
| 32 | controlled clinical trial.pt.                                                                                                                   | 92,933    |
| 33 | randomized.ab.                                                                                                                                  | 354,404   |
| 34 | placebo.ab.                                                                                                                                     | 174,060   |
| 35 | clinical trials as topic.sh.                                                                                                                    | 180,151   |
| 36 | randomly.ab.                                                                                                                                    | 243,654   |
| 37 | trial.ti.                                                                                                                                       | 160,708   |
| 38 | 30 or 31 or 32 or 33 or 34 or 35 or 36 or 37                                                                                                    | 1,034,856 |
| 39 | 7 and 29 and 38                                                                                                                                 | 1,008     |

Search results: Embase via OvidSP (1996 to 20 September 2018)

| #  | Search terms                                                                                                                                                            | Results   |
|----|-------------------------------------------------------------------------------------------------------------------------------------------------------------------------|-----------|
| 1  | exp chronic kidney disease/                                                                                                                                             | 62,294    |
| 2  | exp kidney disease/                                                                                                                                                     | 849,346   |
| 3  | (chronic kidney or chronic renal).tw.                                                                                                                                   | 92,692    |
| 4  | (CKD or CRD).tw.                                                                                                                                                        | 37,030    |
| 5  | (predialysis or pre-dialysis).tw.                                                                                                                                       | 6,221     |
| 6  | 1 or 2 or 3 or 4 or 5                                                                                                                                                   | 863,647   |
| 7  | exp health behaviour/                                                                                                                                                   | 349,149   |
| 8  | exp habit                                                                                                                                                               | 28,571    |
| 9  | exp lifestyle                                                                                                                                                           | 113,466   |
| 10 | exp lifestyle modification                                                                                                                                              | 30,765    |
| 11 | exp sedentary lifestyle                                                                                                                                                 | 9,819     |
| 12 | lifestyle\$.tw.                                                                                                                                                         | 100,473   |
| 13 | exp health promotion/                                                                                                                                                   | 85,281    |
| 14 | exp health education/                                                                                                                                                   | 285,678   |
| 15 | exp diet                                                                                                                                                                | 324,233   |
| 16 | exp diet therapy                                                                                                                                                        | 333,497   |
| 17 | exp feeding behaviour                                                                                                                                                   | 160,127   |
| 18 | exp renal diet                                                                                                                                                          | 92        |
| 19 | Fruit/ and Vegetables/                                                                                                                                                  | 20,205    |
| 20 | ((diet or diets or dietary) adj5 (Mediterranean or vegetarian or plant-based or American Heart Association* or DASH or western or seafood)).tw.                         | 14,599    |
| 21 | ((diet or dietary or nutrition*) adj (survey* or record or records or score)).tw.                                                                                       | 8,893     |
| 22 | exp exercise                                                                                                                                                            | 312,543   |
| 23 | exp physical activity                                                                                                                                                   | 370,197   |
| 24 | exp smoking                                                                                                                                                             | 312,045   |
| 25 | exp smoking cessation                                                                                                                                                   | 50,560    |
| 26 | exp smoking habit                                                                                                                                                       | 22,226    |
| 27 | exp smoking cessation program                                                                                                                                           | 3,316     |
| 28 | exp drinking behaviour                                                                                                                                                  | 45,218    |
| 29 | exp drinking pattern                                                                                                                                                    | 45,218    |
| 30 | exp binge drinking                                                                                                                                                      | 3,432     |
| 31 | exp alcohol consumption                                                                                                                                                 | 113,850   |
| 32 | exp alcohol abuse                                                                                                                                                       | 37,477    |
| 33 | exp alcohol abstinence                                                                                                                                                  | 5,831     |
| 34 | exp alcohol intoxication                                                                                                                                                | 12,743    |
| 35 | exp alcoholism                                                                                                                                                          | 119,763   |
| 36 | 7 or 8 or 9 or 10 or 11 or 12 or 13 or 14 or 15 or 16 or 17 or 18 or 19 or 20 or 21 or 22 or 23 or 24 or 25 or 26 or 27 or 28 or 29 or 30 or 31 or 32 or 33 or 34 or 35 | 2,186,119 |
| 37 | randomized.ab.                                                                                                                                                          | 540,955   |
| 38 | placebo.ab.                                                                                                                                                             | 249,626   |
| 39 | randomly.ab.                                                                                                                                                            | 354,161   |
| 40 | trial.ti.                                                                                                                                                               | 236,549   |
| 41 | 37 or 38 or 39 or 40                                                                                                                                                    | 1,068,038 |
| 44 | 6 and 36 and 41                                                                                                                                                         | 5,679     |

Search results: CINAHL via EBSCO (1982 to 20 September 2018)

| #   | Search terms                                                                                           | Results |
|-----|--------------------------------------------------------------------------------------------------------|---------|
| S21 | S3 AND S20                                                                                             | 3,343   |
| S20 | S4 OR S5 OR S6 OR S7 OR S8 OR S9 OR S10 OR S11 OR S12 OR S13 OR S14 OR S15 OR S16 OR S17 OR S18 OR S19 | 440,706 |
| S19 | (MH "Alcohol Drinking+")                                                                               | 14,329  |
| S18 | (MH "Alcoholic Intoxication+")                                                                         | 1,759   |
| S17 | (MH "Alcoholism") OR (MH "Alcoholic Intoxication+")                                                    | 10,496  |
| S16 | (MH "Drinking Behaviour+")                                                                             | 16,090  |
| S15 | (MH "Smoking+")                                                                                        | 39,165  |
| S14 | (MH "Aerobic Exercises+")                                                                              | 24,457  |
| S13 | (MH "Therapeutic Exercise+")                                                                           | 32,306  |
| S12 | (MH "Exercise+")                                                                                       | 62,514  |
| S11 | "fruit and vegetables"                                                                                 | 736     |
| S10 | (MH "Diet Therapy+")                                                                                   | 15,217  |
| S9  | (MH "Diet+")                                                                                           | 58,812  |
| S8  | (MH "Health Education+")                                                                               | 83,615  |
| S7  | (MH "Health Promotion+")                                                                               | 37,813  |
| S6  | (MH "Life Style+")                                                                                     | 124,973 |
| S5  | (MH "Habits+")                                                                                         | 45,961  |
| S4  | (MH "Health Behaviour+")                                                                               | 57,214  |
| S3  | S1 OR S2                                                                                               | 33,991  |
| S2  | MH "kidney diseases+"                                                                                  | 33,991  |
| S1  | (MH "Renal Insufficiency+") OR (MH "Renal Insufficiency, Chronic+")                                    | 17,914  |

PsycINFO via OvidSP (1806 to 20 September 2018)

| #  | Search terms                                                                                                                                    | Results |
|----|-------------------------------------------------------------------------------------------------------------------------------------------------|---------|
| 1  | exp Kidney Diseases/                                                                                                                            | 1,983   |
| 2  | (chronic kidney or chronic renal).tw.                                                                                                           | 1,148   |
| 3  | (predialysis or pre-dialysis).tw.                                                                                                               | 70      |
| 4  | (CKD or CRD).tw.                                                                                                                                | 476     |
| 5  | 1 or 2 or 3 or 4                                                                                                                                | 2,613   |
| 6  | exp Health Behaviour/                                                                                                                           | 26,049  |
| 7  | exp HABITS/                                                                                                                                     | 33,531  |
| 8  | exp Eating Behaviour/                                                                                                                           | 18,434  |
| 9  | exp LIFESTYLE/                                                                                                                                  | 10,664  |
| 10 | exp Lifestyle Changes/                                                                                                                          | 1,163   |
| 11 | exp Health Promotion/                                                                                                                           | 22,016  |
| 12 | exp Health Education/                                                                                                                           | 17,199  |
| 13 | exp Behaviour Change/                                                                                                                           | 11,102  |
| 14 | exp DIETS/                                                                                                                                      | 11,487  |
| 15 | exp Food Preferences/                                                                                                                           | 4,394   |
| 16 | "fruit and vegetable*".tw.                                                                                                                      | 2,354   |
| 17 | ((diet or diets or dietary) adj5 (Mediterranean or vegetarian or plant-based or American Heart Association* or DASH or western or seafood)).tw. | 706     |
| 18 | ((diet or dietary or nutrition*) adj (survey* or record or records or score)).tw.                                                               | 582     |
| 19 | exp Physical Activity/                                                                                                                          | 35,706  |
| 20 | exp Exercise/                                                                                                                                   | 23,406  |
| 21 | aerobic exercise/                                                                                                                               | 1,557   |
| 22 | exp SMOKING CESSATION/                                                                                                                          | 12,102  |
| 23 | exp TOBACCO SMOKING/                                                                                                                            | 29,024  |
| 24 | exp Drinking behaviour/                                                                                                                         | 68,488  |
| 25 | exp Alcohol Drinking Patterns/                                                                                                                  | 63,023  |
| 26 | exp ALCOHOLISM/                                                                                                                                 | 29,297  |
| 27 | exp Binge Drinking/                                                                                                                             | 2,069   |
| 28 | exp Alcohol Abuse/                                                                                                                              | 45,860  |
| 29 | exp Alcohol Intoxication/                                                                                                                       | 3,046   |
| 30 | 6 or 7 or 8 or 9 or 10 or 11 or 12 or 13 or 14 or 15 or 16 or 17 or 18 or 19 or 20 or 21 or 22 or 23 or 24 or 25 or 26 or 27 or 28 or 29        | 228,162 |
| 31 | randomized.ab.                                                                                                                                  | 57,824  |
| 32 | placebo.ab.                                                                                                                                     | 36,556  |
| 33 | randomly.ab.                                                                                                                                    | 65,494  |
| 34 | trial.ti.                                                                                                                                       | 26,290  |
| 35 | 31 or 32 or 33 or 34                                                                                                                            | 149,264 |
| 36 | 5 and 30 and 35                                                                                                                                 | 13      |
