# Supplementary material for: Lifestyle behaviour change for preventing the progression of chronic kidney disease: a systematic review
Source: PubMed Central journal article supplement — BMJ Open. 2019 Oct 28;9(10):e031625. doi: 10.1136/bmjopen-2019-031625 (PMC6830616; doi:10.1136/bmjopen-2019-031625), 2019-10-28
Supplement: bmjopen-2019-031625supp004.pdf [file bmjopen-2019-031625supp004.pdf]

**Supplementary Table S2.** Characteristics of lifestyle behavior change interventions

|                                          | Total trials<br>(n=26) | Dietary<br>(n=11) | Physical activity<br>(n=8) | Lifestyle <sup>1</sup><br>(n=7) |
|------------------------------------------|------------------------|-------------------|----------------------------|---------------------------------|
| <b>Characteristic</b>                    |                        |                   |                            |                                 |
| <i>Setting<sup>2</sup></i>               |                        |                   |                            |                                 |
| Individual                               | 9                      | 6                 | 1                          | 2                               |
| Combination individual and group         | 7                      | 1                 | 4                          | 2                               |
| Group                                    | 2                      | 1                 | 0                          | 1                               |
| Not specified                            | 7                      | 3                 | 2                          | 2                               |
| <i>Delivery</i>                          |                        |                   |                            |                                 |
| Face-to-face with telephone follow-up    | 14                     | 7                 | 6                          | 1                               |
| Face-to-face                             | 7                      | 3                 | 1                          | 3                               |
| Online                                   | 1                      | 0                 | 0                          | 1                               |
| Not specified                            | 3                      | 1                 | 0                          | 2                               |
| <i>Location<sup>2</sup></i>              |                        |                   |                            |                                 |
| Hospital/clinic                          | 10                     | 7                 | 1                          | 2                               |
| Home                                     | 8                      | 1                 | 4                          | 3                               |
| Gym                                      | 3                      | 0                 | 1                          | 2                               |
| Other <sup>3</sup>                       | 3                      | 1                 | 2                          | 0                               |
| Not specified                            | 6                      | 3                 | 1                          | 2                               |
| <i>Total intervention duration</i>       |                        |                   |                            |                                 |
| 1 month                                  | 1                      | 1                 | 0                          | 0                               |
| 3 months                                 | 10                     | 3                 | 6                          | 1                               |
| 4 to 6 months                            | 6                      | 3                 | 1                          | 2                               |
| 12 months                                | 5                      | 1                 | 1                          | 3                               |
| 24 to 36 months                          | 4                      | 3                 | 0                          | 1                               |
| <i>Facilitator/ educator<sup>2</sup></i> |                        |                   |                            |                                 |
| Dietician                                | 12                     | 8                 | 0                          | 4                               |
| Nurse                                    | 6                      | 0                 | 1                          | 5                               |
| Exercise physiologist/ physiotherapist   | 4                      | 0                 | 2                          | 2                               |
| Psychologist                             | 3                      | 1                 | 0                          | 2                               |
| Social worker                            | 2                      | 0                 | 0                          | 2                               |
| Nephrologist                             | 2                      | 1                 | 0                          | 1                               |
| Researcher                               | 2                      | 2                 | 0                          | 0                               |
| General practitioner/medical doctor      | 1                      | 0                 | 1                          | 0                               |

<sup>1</sup> Any combination of diet, physical activity, weight reduction or smoking cessation<sup>2</sup> Many interventions use multiple settings, locations and facilitators, therefore numbers overlap<sup>3</sup> Community, physical therapy or cardiac rehabilitation centers, university premises

|                               |           |   |   |   |
|-------------------------------|-----------|---|---|---|
| Volunteers/peers              | <b>1</b>  | 1 | 0 | 0 |
| Other <sup>4</sup>            | <b>5</b>  | 0 | 3 | 2 |
| Not specified                 | <b>4</b>  | 2 | 2 | 0 |
| <i>Number of facilitators</i> |           |   |   |   |
| Single                        | <b>12</b> | 7 | 3 | 2 |
| Multiple                      | <b>8</b>  | 2 | 2 | 4 |
| Not specified                 | <b>6</b>  | 2 | 3 | 1 |
| <i>Informed by theory</i>     |           |   |   |   |
| Yes                           | <b>5</b>  | 2 | 2 | 1 |
| No                            | <b>21</b> | 9 | 6 | 6 |

---

<sup>4</sup> Clinical pharmacy specialist, health educator, physical education professional, community network officer
