# Supplementary material for: Lifestyle behaviour change for preventing the progression of chronic kidney disease: a systematic review
Source: PubMed Central journal article supplement — BMJ Open. 2019 Oct 28;9(10):e031625. doi: 10.1136/bmjopen-2019-031625 (PMC6830616; doi:10.1136/bmjopen-2019-031625), 2019-10-28
Supplement: bmjopen-2019-031625supp005.pdf [file bmjopen-2019-031625supp005.pdf]

**Supplemental Table S3.** Characteristics of interventions with improved outcomes

|                                                                           | Education        | Enablement      | Training       | Persuasion     | Environmental restructuring | Modelling      | Incentivisation | Total functions |
|---------------------------------------------------------------------------|------------------|-----------------|----------------|----------------|-----------------------------|----------------|-----------------|-----------------|
| <b>Studies with an improvement in at least one primary outcome (n=18)</b> |                  |                 |                |                |                             |                |                 |                 |
| Meuleman (2016)                                                           | •                | •               |                |                |                             |                | •               | 3               |
| De Brito-Ashurst (2013)                                                   | •                |                 | •              |                |                             |                |                 | 2               |
| MDRD Study (1995)                                                         | •                | •               | •              | •              | •                           | •              | •               | 7               |
| Mekki (2010)                                                              | •                |                 |                |                |                             |                |                 | 1               |
| Paes-Barreto (2013)                                                       | •                |                 |                | •              |                             | •              |                 | 3               |
| Pisani et al (2016)                                                       | •                |                 |                |                |                             |                |                 | 1               |
| Rosman (1990)                                                             | •                | •               |                |                |                             |                |                 | 2               |
| Saran (2017)                                                              | •                | •               |                |                |                             |                |                 | 2               |
| Patil (2013)                                                              | •                |                 |                |                |                             |                |                 | 1               |
| Flesher et al (2011)                                                      | •                | •               | •              |                |                             |                |                 | 3               |
| Howden et al (2013)                                                       | •                | •               | •              |                | •                           |                |                 | 4               |
| Jiamjariyapon (2017)                                                      | •                | •               |                |                |                             |                |                 | 2               |
| Joboshi (2017)                                                            | •                | •               |                |                |                             |                |                 | 2               |
| Teng et al (2013)                                                         | •                | •               |                | •              |                             |                |                 | 3               |
| Aoike et al (2015)                                                        | •                | •               | •              |                |                             |                |                 | 3               |
| Kao et al (2012)                                                          | •                | •               | •              | •              |                             |                |                 | 4               |
| Rossi et al (2014)                                                        | •                |                 | •              |                |                             |                |                 | 2               |
| Tang (2017)                                                               | •                | •               | •              |                |                             |                |                 | 3               |
| <b>Total studies (n,%)</b>                                                | <b>18 (100%)</b> | <b>12 (67%)</b> | <b>8 (44%)</b> | <b>4 (22%)</b> | <b>2 (11%)</b>              | <b>2 (11%)</b> | <b>2 (11%)</b>  |                 |
| <b>Studies with no improvements in primary outcomes (n=8)</b>             |                  |                 |                |                |                             |                |                 |                 |
| Campbell et al (2008)                                                     | •                | •               |                |                |                             |                |                 | 2               |
| Clark (2018)                                                              |                  | •               |                |                | •                           |                |                 | 2               |
| Dussol (2005)                                                             | •                | •               |                |                |                             |                |                 | 2               |
| Ishani (2016)                                                             | •                | •               |                |                |                             |                |                 | 2               |
| Greenwood (2015)                                                          |                  | •               | •              |                | •                           |                |                 | 3               |
| Barcellos (2018)                                                          |                  | •               | •              |                |                             |                |                 | 2               |
| Leehey (2016)                                                             |                  |                 | •              |                |                             |                |                 | 1               |
| Van Craenenbroeck (2015)                                                  |                  |                 | •              |                |                             |                |                 | 1               |
| <b>Total functions (n,%)</b>                                              | <b>3 (38%)</b>   | <b>6 (75%)</b>  | <b>4 (50%)</b> | <b>0</b>       | <b>2 (25%)</b>              | <b>0</b>       | <b>0</b>        |                 |
